# Supplementary material for: Development of colloidal gold-labeled dual-probe lateral flow immunoassay for sensitive aflatoxin B1 detection by a signal amplification strategy
Source: Royal Society of Chemistry journal article supplement (doi:10.1039/d5ay01543j), 2025-12-04
Supplement: d5ay01543j1.pdf [file d5ay01543j1.pdf]

## **Supplementary Information**

### **Development of colloidal gold labeled dual-probe lateral flow immunoassay for sensitive aflatoxin B1 detection by signal amplification strategy**

Lingling Wang,<sup>ab</sup> Lingzhi Yan,<sup>ab</sup> Haoran Wang,<sup>a</sup> Rui Liu,<sup>ab</sup> Ying Fan,<sup>ab</sup> Yuanlin Sun<sup>\*ab</sup>

<sup>a</sup>

Department of Life Science, Yuncheng University, Yuncheng 044000, Shanxi, China.

<sup>b</sup>

Shanxi Technology Innovation Center of High Value-Added Echelon Utilization of Premium Agro-Products, Yuncheng University, Yuncheng 044000, China.

Current address of Haoran Wang: ino-UAE International Cooperative Joint Laboratory of Pathogenic Microorganism Rapid Detection, Qingdao Nucleic Acid Rapid Detection Engineering Research Center, Qingdao Key Laboratory of Nucleic Acid Rapid Detection, College of Biological Engineering, Qingdao University of Science and Technology, 266042 Qingdao, China.

\*Corresponding author: sylwts@aliyun.com.

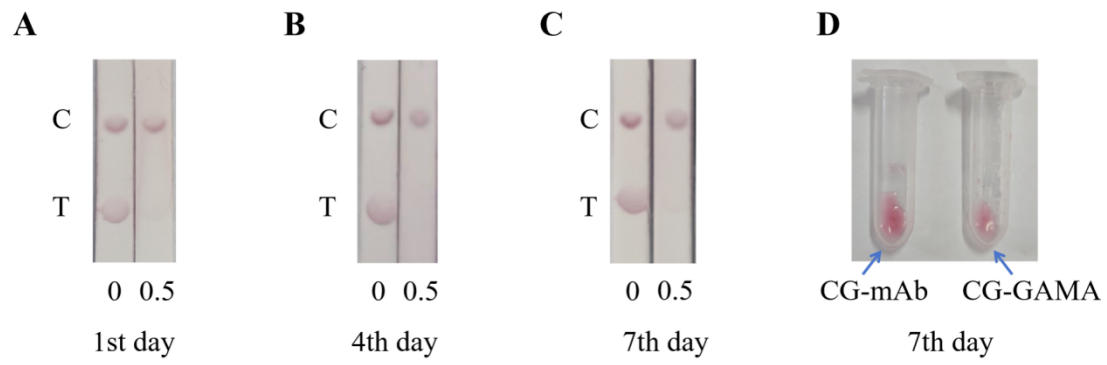

Figure S1. The storage stability of the dual-probe LFIA by testing the standards solution at 0 ng/mL and 0.5 ng/mL on the 1st (A), 4th (B), 7th (C) days of storage (at 4 °C); The physical state of the CG-mAb and CG-GAMA solution on 7th day.
